# Supplementary material for: The role of sublimation as a driver of climate signals in the water isotope content of surface snow: Laboratory and field experimental results
Source: Copernicus journal article supplement (doi:10.5194/tc-2021-87), 2021-04-14
Supplement: Supplementary file [file tc-2021-87-AC3-supplement.pdf]

## RC3

### General Comments:

The new, impressive, and labor intensive field measurements from East Greenland on snow-water vapor exchange, as well as laboratory measurements, are a valuable dataset which provides much needed insights on the effects of sublimation on the isotopic content of surface snow, and constraints on the post-depositional processes affecting the evolution of the isotopic composition of surface snow and atmosphere water vapor. The findings clearly show that sublimation does indeed impart an isotopic signal to the surface snow that propagates downward 1-2 cm over the period of 4-6 days during periods of clear skies. A simple box model is utilized to help understand the relatively isotopically enriched surface snow due to solid-vapor phase changes (i.e., sublimation) for  $\delta^{18}\text{O}$  and the concomitant decrease in dexcess. The box model helps to understand and explain the combined effects of surface sublimation and diffusion of the signal observed at depth in the homogenous lab-based snowpack.

The comparison between field samples, field box samples, and laboratory experiments provides a good test of how large an isotopic effect sublimation has in a controlled environment (albeit extremely dry compared to field conditions). It also helps to identify certain environmental parameters that may be causing unexpected changes in the isotopic composition of field samples, like synoptic weather variations altering atmospheric vapor  $\delta^{18}\text{O}$  over hourly timescales or if the snow surface composition is driving the vapor  $\delta^{18}\text{O}$  due to deeper snow layers influencing the surface snow by internal diffusion between grains.

The authors highlight one of the key findings: "A key finding from field experiments is that both sublimation and vapor deposition influence the surface snow on an hourly timescale; this is supported by laboratory experiments and model results, demonstrating that sublimation has the ability to influence the mean surface snow isotopic composition in the top 2-3 cm of the snowpack during precipitation-free periods. These changes are occurring faster than the average recurrence of precipitation events, and could produce substantial changes in the mean isotopic composition of the upper several cm of the snowpack over a long precipitation-free period. This suggests that effects from sublimation and vapor deposition may be superimposed on the precipitation signal, resulting in a snowpack record more indicative of atmospheric conditions and water vapor isotopic composition than condensation temperature (i.e.  $\delta^{18}\text{O}$ ) or precipitation source region conditions (i.e. d-excess). The extent to which this occurs is dependent on the accumulation rate at the ice core site, as these processes primarily influence the top few cm of the snow column."

Although the authors do an excellent job documenting the hourly changes to the surface snowpack in the field sample experiments (FS1-4), the question remains: what is the net effect to the snow pack isotopic composition over a weekly or monthly time period that is precipitation free? If sublimation enriches the snow surface and thus the overlying vapor isotopic composition, and then at night during negative LHF, equilibrium fractionation during vapor deposition should redeposit more  $\delta^{18}\text{O}$  negative water vapor onto the snow surface, and thus the net change is a minimal enrichment over weekly periods. For example, the initial FS2 0-0.5 cm values shown in Fig. 5 appear to have a mean value of  $\sim -24$  ‰ on July 7th and by July 9th the mean value is  $\sim -22$  ‰, smaller in magnitude than the  $\delta^{18}\text{O}$  increases observed in the FB 2-4 samples that were shaded/covered. However, by July 18th the mean value is  $-23.5$  ‰ and then drops down to  $-32$  ‰ ("likely due to a precipitation event preceding FS4 which may have deposited surface snow with anomalously low  $\delta^{18}\text{O}$ "), but the point is that over the  $\sim 3$  week period the sublimation signal that should be slowly increasing  $\delta^{18}\text{O}$  is overwhelmed by either fresh precipitation or more depleted  $\delta^{18}\text{O}$  atmospheric water vapor from elsewhere. The sublimation of the surface snow on day-to-

day timescales appears to be less important to the overall seasonal isotopic composition of the surface snow in regions like Greenland with more frequent synoptic systems and advection of water vapor from marine sources (e.g. Baffin Bay, Arctic Ocean or North Atlantic).

On the other hand the laboratory experiments are excellent demonstrators of intense sublimation over prolonged periods (using a continuous LHF equivalent to the max daily LHF in the field) and use a humidity level about 30-40x less than the atmospheric values found during the field experiments, which produces a very strong sublimation signal in the surface snow for L1-L8. The extreme sublimation rates make it a bit harder to draw comparisons to the field experiments, but provides an upper bound for the impact on isotopic enrichment of surface snow  $\delta^{18}\text{O}$  and deuterium excess depletion during summer months. The smaller impact in the FS experiments shows that sublimation is still an important factor on diurnal timescales (daytime vs nighttime), but it remains unclear what the cumulative impact would be on the snowpack isotopic composition if at the end of the summer season a snow pit was sampled at 1cm increments would the sublimation changes be detectable or swamped by other post-depositional process (wind redeposition), synoptic scale atmospheric vapor imprints, or new precipitation events bringing in low  $\delta^{18}\text{O}$  snowfall? Clearly sublimation (and vapor deposition) is an important factor on the diurnal timescales during accumulation intermittency, but as the authors acknowledge: "Whether the magnitude of the mean isotope change due to sublimation and snow-vapor exchange outweighs the effects of snow redistribution, accumulation bias, and diffusion has yet to be determined."

The authors make a strong case that sublimation/vapor deposition changes do occur to the surface snow pack (~1-2cm for the FS snow surface samples) on sub-diurnal timescales. They argue that "These changes are occurring faster than the average recurrence of precipitation events, and [therefore] could produce substantial changes in the mean isotopic composition of the upper several cm of the snowpack over a long precipitation-free period." The authors then speculate that effects from sublimation and vapor deposition MAY be superimposed on the precipitation signal, "resulting in a snowpack record more indicative of atmospheric conditions and water vapor isotopic composition than condensation temperature (i.e.  $\delta^{18}\text{O}$ ) or precipitation source region conditions (i.e. d-excess)." Although this is a reasonable speculation their data is not sufficient to support such conclusions about the monthly or seasonal timescale impacts of the two-way exchange driven by sublimation/condensation. Thus, it is not appropriate for them to assess the relevance of their results to the scale of the seasonal amplitude in the isotope signal for a firn core from the Renland Ice Cap. The changes observed in the FS field experiments (mean of ~1.8‰ for FS1-4  $\delta^{18}\text{O}$  range based on Table 2) occur on short (multi-day) timescales but in order to compare the cumulative impact of these processes to the seasonal amplitude, they would need to have sampled a nearby snow pit at the start of the field campaign in early July and again at the end of the month to determine the net effect, and ideally throughout the entire summer (apparently new data will be available from Wahl et al., in review). The authors do acknowledge that "In order to fully understand the implications of sublimation and snow-vapor isotope exchange on the ice core record, it is necessary to quantify the effects of these processes over the course of a full year" and while that is not within the scope of this paper they go on to make concluding statements that the results support their hypothesis "that rapid change occurs in a natural setting and propagates into the snowpack, substantially altering the initial precipitation isotope signal." Although true on short timescales (sub-diurnal to diurnal) the results do not provide enough information to make definitive conclusions about the relative magnitude of sublimation/vapor deposition on longer timescales (i.e. years to decades) relevant to ice core interpretations.

I agree strongly with the authors that further research is needed over seasonal and annual timescales and that their results "suggest that these variables contribute to a combined isotope signal, in which  $\delta^{18}\text{O}$  and d-excess in ice core records likely incorporate individual precipitation

events (i.e. condensation temperature and moisture source region conditions, respectively), surface redistribution (i.e. wind drift and erosion), and a post-depositional alteration signal reflecting atmospheric conditions at the ice core site.” Their suggestion that “Snow isotope models such as CROCUSiso (Touzeau et al., 2018), the Community Firn Model (Stevens et al., 2020), and isotope-enabled climate models” would therefore be improved through the incorporation of isotope fractionation during sublimation, snow-vapor isotope exchange, and snow metamorphosis.” is certainly justified by their findings from both the laboratory and field experiments and results from such modeling efforts may help to interpret the relative contributions of the aforementioned processes affecting post-depositional changes.

Based on the above assessment, I would recommend acceptance with minor revisions but with a primary focus on revising the Discussion and Conclusion sections regarding the broader application of their findings to seasonal and yearly timescales, speculation on the cumulative effect (monthly, seasonal, or yearly) of short-term sublimation/vapor deposition isotopic changes to surface snow, and their assessment of relevance to the interpretation of annual ice core records (e.g. Renland) is not yet supported by the four separate 2-4 day field data experiments.

Specific Comments:

Note: Please see the line by line comments in the commented pdf. Their repetition here is duplicative, although I have pulled out some of key comments below:

Line 187: If this is the case, are you suggesting the results from the field experiments are only affected at the snow surface by sublimation as well, and the rest of the signal at depth is diffusion (below 0.5cm)?

We are suggesting that the laboratory experiments are only affected at the snow surface by sublimation, and the rest of the signal at depth is dominated by diffusion. In the case of the laboratory experiments, small fans maintain mixed air in the chamber, but do not blow air directly across or into the snow samples. However, in field conditions there are stronger wind speeds driving air through the upper several cm of the snowpack. This forced ventilation may cause increased sublimation at depth, or greater vapor exchange between the atmosphere and pore spaces between snow grains (Town et al., 2008). Therefore, the model more closely reflects conditions of the laboratory experiments, in which we are focusing on sublimation in a controlled environment.

We have revised L188 to clarify this: “...any isotopic changes below 0.5 cm can be attributed to diffusion (Ebner et al. 2017). In the laboratory experiments, because there is low airflow we can assume that there is no forced ventilation driving sublimation below the surface; however, this may not be the case for field conditions (Town et al., 2008).”

Line 284: It would be useful to run the snow isotope model with some of the field observations and input values and show how that compares to the model results from L5, which has a very high LHF that is continuous versus much lower mean LHF for FB or FS.

The snow isotope model is intended to simulate the effects of sublimation under dry air. In this case, it is known that any vapor in the system originated from the snow surface, and as such we can use a mass balance model to estimate the snow isotope value from the vapor isotopic composition.

In the case of the field experiments, there are two reasons why it is more difficult to model the snow composition from vapor measurements: 1) Over the course of the experiment, it is unknown what fraction of the vapor originated from the snow surface, and what fraction of the vapor was transported from elsewhere above the ice sheet or the ocean. Thus, our mass balance model may incorrectly estimate changes in the snow surface based on vapor that is not entirely sublimative flux from the snow surface. 2) Our mass balance model is developed based on a scenario in which sublimation is constantly occurring and there is no condensation. All field experimental periods have time periods with negative latent heat flux values, indicating condensation is occurring. Therefore, we cannot use the mass balance model for a full experimental period.

However, we do agree that in the context of this manuscript, it would be beneficial to demonstrate the usefulness of this model in a field setting. Therefore, we have run the model for the period from 6:00-18:00 on July 25 during F4. Throughout this period, the LHF is positive, indicating sublimation is occurring. In this case, we must assume that the measured vapor originates from the snow surface, which may not be true depending on the synoptic weather patterns. With the data we have, we are unable to speculate whether this is the case. However, as the vapor measurements are very close (~10cm) above the snow surface, the mixing state might be minor.

The following is implemented in the paper in L312 of the discussion:

“Figure X [shown here below] shows the mass balance model output for 6:00-18:00 on July 25. The starting snow isotopic composition is the same as the starting composition of the FB4 samples, and model input includes vapor measurements for d18O, d-excess, and humidity, as well as latent heat flux measurements and a linear estimate of temperature (as temperature data is not available for this period). We find that the surface d18O value increases by approximately 0.6 per mil, and the d-excess value decreases by approximately 1.3 per mil. The change propagates only 0.5 cm below the snow surface.

In comparison, the surface (0-0.5 cm) FB4 sample during this time period increases by approximately 1 per mil, and d-excess decreases by approximately 4 per mil (see Fig. A13). There is also a greater change in the sample from 0.5-1 cm, which increases by approximately 0.7 per mil in d18O, and decreases by approximately 2.5 per mil in d-excess in FB4 samples. The larger change observed in the field samples may be due to several factors, including the possibility that the measured vapor is a combination of sublimated vapor from the samples and vapor sourced from elsewhere. Additionally, wind pumping in the field setting may increase the rate of isotope change in the FB samples. As expected from the lab experiments, we see a similar trend towards enriched snow when running the model with actual field observations.”

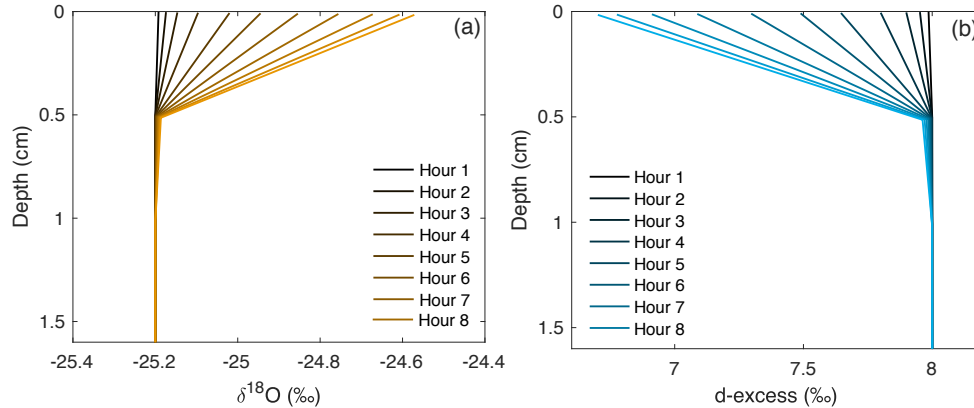

Line 288: Worth noting here that in the FS experiments depth propagation is only 1-2cm (max)

This is not a relevant comparison in L288, as the FS experiments take place over a shorter time period (2-2.5 days), and therefore it is expected that the depth propagation is lower than the laboratory experiments (4-6 days) and model (4 days).

Line 299: See comment from Line 284, and run the isotope box model with more realistic field conditions so in the discussion one can comment on the degree of sublimation impact in the field.

See response to previous comment.

Line 325: This one of the key questions, as the long term (weekly/monthly) result may not cause a significant deviation from the original snow-pack precipitation if the daytime sublimation and nighttime condensation of vapor balance each other out. What is the NET change of the isotopic content over the entire month of July for the surface snow? Include in the Discussion.

With the data we currently have, we cannot differentiate between the long-term effects of precipitation and sublimation/deposition on the surface snow isotopic composition. Each of the experimental periods took place during a precipitation-free period, but there was precipitation between the experimental periods. In this study we do not have continuous snow surface data for the entire month of July, which would be required to determine the net isotope change due to precipitation vs. sublimation/condensation.

However, we do have continuous measurements of latent heat flux over the month of July, and there is an average LHF of 3.1 W/m<sup>2</sup>. This would indicate that daytime sublimation dominates over nighttime vapor deposition, and there would likely be a net increase in surface snow d18O over the full month. Since the reviewer asks specifically for speculations about the net influence of vapor exchange on the snow isotopic composition we have revised the paragraph from L358-370:

To assess the relevance of our results on longer timescales, we make use of the simple mass balance model and an observed mean latent heat flux in July of 3.1 W/m<sup>2</sup>, indicating a net removal of snow from the surface due to sublimation. By assuming equilibrium fractionation during sublimation (Wahl et al2021) we can calculate the isotopic composition of the humidity flux and the associated removal of isotopologues. When considering reasonable values of a 5 cm layer of snow, a snow density of 300 kg/m<sup>3</sup>, an initial isotopic composition of -20‰ d18O and a surface temperature of -9 C for the month of July, the snow would be enriched by ~4‰ due to the net humidity flux which is substantial. For comparison, the seasonal amplitude (i.e.

summer peak to winter trough) at the Renland Ice Cap, for example, is about 8‰ in d18O (Hughes2020). We acknowledge that this is a highly simplified mass balance calculation without taking into account the vapor isotopic composition or precipitation inputs. However, since vapor exchange is a continuous process it will continuously affect the layer of snow that is in contact with the atmosphere, and will therefore imprint on the snow isotopic composition with a general net daily sublimation signal during months with a net sublimation flux.

Which months show a net sublimation flux is dependent on the geographical location and general climatology of the area. Especially in the context of paleoclimatological interpretation of ice cores, this cannot be assumed to be constant in time. If the vapor-snow exchange imprints on the seasonal snow isotopic composition as indicated in the result of the mass balance calculation, one would need to take changes in seasonality into account when making assumptions about vapor-exchange effects on paleo timescales, as has been previously demonstrated for precipitation seasonality (Werner et al. 2000).

On shorter timescales in our laboratory experiments we observe changes of up to 8 per mil d18O and 20 per mil d-excess over time periods of several days, and in FS field experiments we find an average change of 2.09 per mil d18O and 3.78 per mil d-excess on very short (sub-diurnal) timescales. This observation, in combination with our mass balance calculation of 4 per mil change in d18O over the month of July, suggests that under typical natural conditions, changes in the surface isotope value occurring on a short timescale may have an impact on the mean seasonally-recorded isotope signal. Previous studies have addressed the effect of seasonally-biased accumulation rate on diffusion and the recorded 18O isotope signal (Persson et al., 2011; Casado et al., 2020; Hughes et al., 2020) and the effect of physical modifications and snow redistribution of the snow surface on the accumulation intermittency (Zuhr et al., 2021), but the effect of sublimation driven changes in surface snow isotopic composition between precipitation events has not been quantified previously. Whether the magnitude of the mean isotope change due to sublimation and snow-vapor exchange outweighs the effects of snow redistribution, accumulation bias, and diffusion has yet to be determined.

Citation:

Werner, M., Mikolajewicz, U., Heimann, M., & Hoffmann, G. (2000). Borehole versus isotope temperatures on Greenland : Seasonality does matter. *Geophys. Res. Lett.*, 27(5), 723–726.

Wahl, S., Steen-Larsen, H. C., Reuder, J., & Hörhold, M. (2021). Quantifying the Stable Water Isotopologue Exchange between Snow Surface and Lower Atmosphere by Direct Flux Measurements. *Journal of Geophysical Research: Atmospheres*, 1–24. <https://doi.org/10.1029/2020jd034400>

Line 350: The authors have not demonstrated that this is the case, as their field snow surface experiments are only on the order of 2-4 days, and they do not provide data from a snowpit at the end of the ~3 week sampling period that can support this statement. It may or may not be superimposed on the precipitation signal, and therefore it is an assumption that the "resulting snowpack record would be more indicative of atmospheric conditions..."

While a snowpit would be useful in future studies, we do know that over each individual 2-3 day experimental period there is no precipitation. Therefore, any changes observed in the surface snow over the experimental period is an atmospheric signal superimposed on the precipitation signal. Because we do not know the relative strength of the atmospheric signal vs. the precipitation signal, we have changed the wording of L352: "...resulting in a snowpack record indicative of multiple parameters including atmospheric conditions, water vapor isotopic

composition, condensation temperature (i.e. d18O), and precipitation source region conditions (i.e. d-excess)”

Figure A15. Include the RMSE or 2 sigma stdev for the FS1-4 data, and error bar on each graph, so that readers can view the uncertainty around the fit.

The RMSE has been added to Table 3, as requested in the later comment. We have also added the error bar for the linear regression +/- the standard deviation in Figure A15.

Technical Corrections:

Figure 8 caption. The color appears to be brown in the image. Change “FS surface snow 0-0.5 cm values are shown in dark orange” to brown

“Dark orange” has been changed to “brown”.

Line 329: “In general, the box samples experience less decrease (should be increase) in d18O than associated FS samples due to minimized vapor deposition, and greater decrease in d-excess due to increased sublimation”

“Decrease” is correct here, as this sentence is referring specifically to periods of decreasing d18O when there is a negative LHF. This sentence has been revised to make this more clear: “In general, the box samples experience less decrease in d18O than associated FS samples due to minimized vapor deposition during periods of negative LHF, and greater total decrease in d-excess due to increased total sublimation across the entire experimental period.”

Figure A13. Figure label says 2.5-4.5 cm (yellow), need to be consistent with Figure caption that states “2.5-4cm below the surface”.

The figure caption has been corrected: “...at 2.5-4.5 cm below the surface.”

Comments from annotated PDF:

L18: Use a qualifier: "minor" or "modest", as the impact is likely negligible over annual averaging in higher accumulation regions with more continuous snow fall.

L18 has been changed to: “...processes such as sublimation play a modest role in creating the climate signal...”

L20: Add “, particularly in regions of low accumulation.”

L20 has been changed to: “...ice core climate record should be interpreted as such, particularly in regions of low accumulation.”

Table 1: Note in the caption that L6-L8 were performed at a different lab.

The caption has been modified: “Overview of all experiments conducted. Eight Laboratory experiments were completed, with L1-L5 completed at the University of Colorado Boulder, and L6-L8 completed at the University of Copenhagen. Four field experiments (F1-F4) were completed at the East Greenland Ice Core Project field site. Field experiments included...”

L87: hopefully this can be moved to directly below Eq. 1. Almost seems like a Table caption where its located.

This placement is just a function of the preprint typesetting, and should be fixed in the final version.

L94: can you provide a comparison to polar air humidity like at the Greenland summit? In ppm

The mean polar air humidity for July 2019 at the Greenland summit is ~3400 ppmv (calculated from relative humidity provided at [https://gml.noaa.gov/dv/data/index.php?site=sum&perpage=100&pageID=1&showall=1&frequency=Hourly%2BAverages&parameter\\_name=Meteorology](https://gml.noaa.gov/dv/data/index.php?site=sum&perpage=100&pageID=1&showall=1&frequency=Hourly%2BAverages&parameter_name=Meteorology)).

Fig 1 caption: Can you provide arrows with labels on FS (blue photo) to make it very clear which FS samples are sampled at the respective depths? Thanks

Labels for depths of FS samples have been added to Figure 1.

L105: Cite: Schauer, Schoenemann, & Steig. Routine high-precision analysis of triple water-isotope ratios using cavity ring-down spectroscopy. RCMS, 2016

The citation for Schauer et al, 2016 has been added.

L120: Were the experimental setups and Picarro CRDS analyzers (water standards, protocols, etc.) identical between CU Boulder and UCopenhagen? This could potentially impact the results (depending on memory differences between instruments, etc.)

Water standards were different but had similar ranges (all standards are listed in Table A1), and the Picarro CRDS analyzers were different instruments but the same models. Calibration protocols would account for any differences between the individual instruments, and the experimental setups were otherwise identical.

L126: It would be helpful to have this in the same units as above for humidity (line 94, 100ppm, or provide both specific and relative)

L94 has been changed to: "...resulting in humidity <100 ppm (i.e. <5% RH)."

L216: Clarify: Changes in the isotope signal are observed to propagate several cm into snow pack due to diffusion over X-period, driven by the induced ...

L216 has been clarified: "Changes in the isotope signal are observed to propagate several cm into the snowpack due to diffusion over 4-6 days, driven by the induced..."

Table 2: It would be useful to provide the average of FS1-4 at the bottom of the table for both d18O and dxs, and can be used in the discussion, as its more representative to discuss the averages than the maximum value that occurred.

The mean of the isotope ranges for the experiments is: d18O = 2.09; d-excess = 3.78. This has been added to a bottom row of Table 2.



In the discussion L362-363 has been changed from “and in FS field experiments we find up to 3 per mil changes in d18O and 4 per mil changes in d-excess” to “and in FS field experiments we find an average change of 2.09 per mil d18O and 3.78 per mil d-excess”

Table 2: Based on Fig. 5, the range of FS2 0-0.5cm appears to only be ~2.4 permil, not 3. Can you double check?

The range of FS2 0-0.5 cm of 3 permil is correct. The minimum value is -25.12, and the maximum value is -22.12 permil.

L275: The sign of the covariation changes throughout the sampling period. For example, FS4, vapor d18O increases mid-day July 25, while the FS d18O decreases. If sublimation is occurring during a positive LHF period, then shouldn't the FS d18O snow surface become enriched (less negative d18O), as well as the vapor d18O? Can you discuss the difference in evolution of FS4 relative to the others?

Over the mid-day July 25 during F4, it is the case that the FS4 samples from 0.5-4 cm show decreasing d18O while the vapor d18O is increasing. This may be due to some variation in the subsurface layers due to precipitation or buried snow dunes from wind effects, which happens to be stronger in FS4 than in other experiments.

However, the surface 0-0.5 cm sample is increasing throughout most of the mid-day period. It is expected that the surface 0-0.5 cm sample would show the closest co-variation with vapor in comparison to the deeper samples. To make it more clear that the surface sample is of primary interest, the 0-0.5 cm dark brown line has been made bold in all subplots of Fig. 5.

Table 3: Recommended to include the RMSE for the 3hr snow sampling resolution for each experiment in a new column, which might show that FS4 had a very large amount of scatter around the fit.

We have added the RMSE for each experiment to the table, which is as follows:

FS1 = 1.62; FS2 = 1.67; FS3 = 1.60; FS4 = 1.39

Table 3: FS4: Although the P-value is significant, the R-value of 0.49, or R<sup>2</sup> of 0.24 variance explained is a pretty low correlation. Despite the large diurnal variation in vapor d18O, the FS d18O does not seem to track it as expected, which is something to consider in the Discussion. See comment above about RMSE.

There are many factors which could potentially drive the relationship between the snow surface d18O and vapor d18O. As discussed in L334-345, it is difficult to isolate specific processes occurring in the field. Changes in the snow surface isotopes may be due to a combination of sublimation, vapor condensation, and other post depositional effects such as wind pumping and diffusion. For example, the deeper snow samples (0.5-4 cm) in FS4 exhibit a different pattern than in FS1-FS3, which may be due to buried wind dunes from precipitation events occurring in the time period between F3 and F4. Diffusion between the deeper layers and the surface 0-0.5 cm sample may alter the surface layer and reduce the strength of the relationship between the surface layer and the vapor isotopes (as discussed in L340-344).

The isotopic composition of atmospheric vapor is also driven by synoptic-scale variability, which may not be imprinted on the snow surface as rapidly as other processes such as sublimation.

With the limited data set currently available for four experiments, we still find a convincing argument in which three of the experiments show statistically significant relationships, even if one of these (FS4) has a slightly lower R value. This finding does not necessarily allow us to determine causality, but it does show that the atmospheric vapor and snow isotopic composition typically co-varies. Additional experiments in the future will help to strengthen this relationship and determine the factors driving changes in vapor vs. snow isotopic composition.

L348: Based on the depth profiles for extreme L1-L8 experiments, I would not state this as 2-3cm, but 1-2cm for field conditions

L348 “2-3 cm” has been changed to “1-2 cm”.

L363: You have not shown that the short term uni-directional sublimation changes are preserved (or not overprinted) on a seasonal timescale, as demonstrated by the large change (decrease) in surface snow  $\delta^{18}\text{O}$  values 2 weeks later in FS4.

This is correct, and this problem is described as potential future work in L371-376. To clarify this sentence, the strength of the wording in L363 has been decreased: “...changes in the surface isotope value occurring on a short timescale may have an impact on the mean seasonally-recorded isotope signal.”

L393: add “(top 1-2 cm)”

L393 has been changed: “...significant changes in the top 1-2 cm of snow surface isotopes...”

L395: “substantial” is an over statement. use somewhat instead.

L395 “substantial” has been changed to “moderately”

L401: Provide a modifier for this statement, as it is still unclear whether the signal is preserved in the ice core record over a seasonal or yearly timescale.

L401 has been changed: “...but also may integrate the atmospheric conditions...”
